# Supplementary material for: Possible Involvement of Long Non-Coding RNAs GNAS-AS1 and MIR205HG in the Modulation of 5-Fluorouracil Chemosensitivity in Colon Cancer Cells through Increased Extracellular Release of Exosomes
Source: MDPI journal article supplement (doi:10.3390/ncrna10020025), 2024-04-15
Supplement: s1 [file s1]

**TABLE S1**  
**List of Upregulated Genes in the cDNA Microarray Dataset**

| <b>Gene Symbol</b>  | <b>Description</b>                                                                                                                                              | <b>Fold-change</b> | <b>p-value</b> |
|---------------------|-----------------------------------------------------------------------------------------------------------------------------------------------------------------|--------------------|----------------|
| <b>GNAS-AS1</b>     | Homo sapiens GNAS antisense RNA 1 (GNAS-AS1), antisense RNA [NR_002785]                                                                                         | 56.87              | 0.0456         |
| <b>FBP1</b>         | Homo sapiens fructose-1,6-bisphosphatase 1 (FBP1), transcript variant 1, mRNA [NM_000507]                                                                       | 51.82              | 0.0491         |
| <b>MIR205HG</b>     | Homo sapiens MIR205 host gene (non-protein coding) (MIR205HG), mRNA [NM_001104548]                                                                              | 39.70              | 0.0491         |
| <b>LOC102723721</b> | PREDICTED: Homo sapiens uncharacterized LOC102723721 (LOC102723721), ncRNA [XR_424100]                                                                          | 29.62              | 0.0477         |
| <b>SMOC2</b>        | Homo sapiens SPARC related modular calcium binding 2 (SMOC2), transcript variant 1, mRNA [NM_022138]                                                            | 20.07              | 0.0456         |
| <b>CCDC106</b>      | Homo sapiens coiled-coil domain containing 106 (CCDC106), mRNA [NM_013301]                                                                                      | 18.62              | 0.0456         |
| <b>ARHGEF26</b>     | Homo sapiens Rho guanine nucleotide exchange factor (GEF) 26 (ARHGEF26), transcript variant 1, mRNA [NM_001251962]                                              | 18.51              | 0.0456         |
| <b>KCTD12</b>       | Homo sapiens potassium channel tetramerization domain containing 12 (KCTD12), mRNA [NM_138444]                                                                  | 18.04              | 0.0491         |
| <b>C11orf39</b>     | Homo sapiens chromosome 11 open reading frame 39 (C11orf39), long non-coding RNA [NR_126159]                                                                    | 17.18              | 0.0456         |
| <b>GAGE7</b>        | Homo sapiens G antigen 7 (GAGE7), mRNA [NM_021123]                                                                                                              | 16.43              | 0.0491         |
| <b>PER3</b>         | Homo sapiens period circadian clock 3 (PER3), transcript variant 4, mRNA [NM_016831]                                                                            | 13.86              | 0.0456         |
| <b>LINC00668</b>    | Homo sapiens long intergenic non-protein coding RNA 668 (LINC00668), long non-coding RNA [NR_034100]                                                            | 13.28              | 0.0456         |
| <b>ZNF44</b>        | zinc finger protein 44 [Source:HGNC Symbol;Acc:HGNC:13110] [ENST00000483826]                                                                                    | 12.53              | 0.0456         |
| <b>CCDC149</b>      | Homo sapiens coiled-coil domain containing 149 (CCDC149), transcript variant 1, mRNA [NM_173463]                                                                | 10.37              | 0.0491         |
| <b>MIR205HG</b>     | Homo sapiens MIR205 host gene (non-protein coding) (MIR205HG), mRNA [NM_001104548]                                                                              | 9.40               | 0.0456         |
| <b>MPP1</b>         | Homo sapiens membrane protein, palmitoylated 1, 55kDa (MPP1), transcript variant 1, mRNA [NM_002436]                                                            | 9.35               | 0.0485         |
| <b>PRG2</b>         | Homo sapiens proteoglycan 2, bone marrow (natural killer cell activator, eosinophil granule major basic protein) (PRG2), transcript variant 1, mRNA [NM_002728] | 9.04               | 0.0456         |
| <b>CSF2</b>         | Homo sapiens colony stimulating factor 2 (granulocyte-macrophage) (CSF2), mRNA [NM_000758]                                                                      | 8.35               | 0.0456         |
| <b>RASSF2</b>       | Homo sapiens Ras association (RalGDS/AF-6) domain family member 2 (RASSF2), transcript variant 1, mRNA [NM_014737]                                              | 7.28               | 0.0456         |

|                     |                                                                                                              |      |        |
|---------------------|--------------------------------------------------------------------------------------------------------------|------|--------|
| <b>TCAM1P</b>       | Homo sapiens testicular cell adhesion molecule 1, pseudogene (TCAM1P), non-coding RNA [NR_002947]            | 7.10 | 0.0491 |
| <b>RDX</b>          | Homo sapiens radixin (RDX), transcript variant 1, mRNA [NM_001260492]                                        | 6.96 | 0.0491 |
| <b>RTKN2</b>        | Homo sapiens cDNA FLJ39352 fis, clone PEBLM2001312, weakly similar to Homo sapiens rhotekin mRNA. [AK096671] | 6.40 | 0.0456 |
| <b>Inc-FARS2-2</b>  | Homo sapiens cDNA clone IMAGE:4523522, partial cds. [BC036859]                                               | 6.32 | 0.0456 |
| <b>NOS3</b>         | Homo sapiens nitric oxide synthase 3 (endothelial cell) (NOS3), transcript variant 2, mRNA [NM_001160109]    | 6.26 | 0.0456 |
| <b>TPM3</b>         | Homo sapiens tropomyosin 3 (TPM3), transcript variant Tpm3.7, mRNA [NM_001043352]                            | 6.03 | 0.0491 |
| <b>MROH6</b>        | Homo sapiens maestro heat-like repeat family member 6 (MROH6), mRNA [NM_001100878]                           | 5.75 | 0.0491 |
| <b>CRIP1</b>        | Homo sapiens cysteine-rich protein 1 (intestinal) (CRIP1), mRNA [NM_001311]                                  | 5.75 | 0.0491 |
| <b>GUSBP1</b>       | Homo sapiens glucuronidase, beta pseudogene 1 (GUSBP1), transcript variant 1, non-coding RNA [NR_027026]     | 5.70 | 0.0456 |
| <b>FHDC1</b>        | Homo sapiens FH2 domain containing 1 (FHDC1), mRNA [NM_033393]                                               | 5.54 | 0.0491 |
| <b>LOC100506379</b> | AF064804 transcription factor SUPT3H {Homo sapiens} (exp=-1; wgp=0; cg=0), partial (5%) [THC2635298]         | 5.39 | 0.0491 |
| <b>RGS9</b>         | Homo sapiens regulator of G-protein signaling 9 (RGS9), transcript variant 1, mRNA [NM_003835]               | 5.19 | 0.0491 |
| <b>DUSP5P1</b>      | Homo sapiens dual specificity phosphatase 5 pseudogene 1 (DUSP5P1), non-coding RNA [NR_002834]               | 5.17 | 0.0491 |
| <b>HSPA1B</b>       | Homo sapiens heat shock 70kDa protein 1B (HSPA1B), mRNA [NM_005346]                                          | 5.13 | 0.0456 |
| <b>TMEM19</b>       | Homo sapiens transmembrane protein 19 (TMEM19), mRNA [NM_018279]                                             | 5.02 | 0.0456 |
| <b>LOC100507002</b> | Homo sapiens uncharacterized LOC100507002 (LOC100507002), long non-coding RNA [NR_110801]                    | 4.92 | 0.0491 |
| <b>SNX21</b>        | Homo sapiens sorting nexin family member 21 (SNX21), transcript variant 4, mRNA [NM_001042633]               | 4.85 | 0.0456 |
| <b>TUBB</b>         | Homo sapiens tubulin, beta class I (TUBB), transcript variant 2, mRNA [NM_178014]                            | 4.79 | 0.0491 |
| <b>NCAPH</b>        | Homo sapiens non-SMC condensin I complex, subunit H (NCAPH), transcript variant 1, mRNA [NM_015341]          | 4.77 | 0.0491 |
| <b>ZFAT</b>         | zinc finger and AT hook domain containing [Source:HGNC Symbol;Acc:HGNC:19899] [ENST00000522974]              | 4.76 | 0.0485 |
| <b>SMC1A</b>        | Homo sapiens structural maintenance of chromosomes 1A (SMC1A), transcript variant 1, mRNA [NM_006306]        | 4.69 | 0.0491 |
| <b>TRDMT1</b>       | Homo sapiens tRNA aspartic acid methyltransferase 1 (TRDMT1), mRNA [NM_004412]                               | 4.56 | 0.0491 |
| <b>TUBB</b>         | Homo sapiens tubulin, beta class I (TUBB), transcript variant 1, mRNA [NM_001293212]                         | 4.56 | 0.0491 |
| <b>RCN3</b>         | Homo sapiens reticulocalbin 3, EF-hand calcium binding domain (RCN3), mRNA [NM_020650]                       | 4.53 | 0.0459 |
| <b>LINC01431</b>    | Homo sapiens long intergenic non-protein coding RNA 1431 (LINC01431), long non-coding RNA [NR_109884]        | 4.50 | 0.0491 |

|                       |                                                                                                                                 |      |        |
|-----------------------|---------------------------------------------------------------------------------------------------------------------------------|------|--------|
| <b>lnc-HORMAD2-1</b>  | LNCipedia lincRNA (lnc-HORMAD2-1), lincRNA [lnc-HORMAD2-1:1]                                                                    | 4.37 | 0.0456 |
| <b>XLOC_I2_007176</b> | BROAD Institute lincRNA (XLOC_I2_007176), lincRNA [TCONS_I2_00013434]                                                           | 4.35 | 0.0491 |
| <b>LOC646014</b>      | Homo sapiens cDNA FLJ44593 fis, clone BLADE2002744. [AK126557]                                                                  | 4.32 | 0.0491 |
| <b>LRRC45</b>         | leucine rich repeat containing 45 [Source:HGNC Symbol;Acc:HGNC:28302] [ENST00000306688]                                         | 4.32 | 0.0491 |
| <b>OBSCN</b>          | Homo sapiens obscurin, cytoskeletal calmodulin and titin-interacting RhoGEF (OBSCN), transcript variant IC, mRNA [NM_001271223] | 4.30 | 0.0491 |
| <b>HMGCR</b>          | Homo sapiens 3-hydroxy-3-methylglutaryl-CoA reductase (HMGCR), transcript variant 1, mRNA [NM_000859]                           | 4.19 | 0.0491 |
| <b>DHCR24</b>         | Homo sapiens 24-dehydrocholesterol reductase (DHCR24), mRNA [NM_014762]                                                         | 4.16 | 0.0456 |
| <b>WDR89</b>          | Homo sapiens WD repeat domain 89 (WDR89), transcript variant 1, mRNA [NM_001008726]                                             | 4.11 | 0.0492 |
| <b>lnc-GPN2-1</b>     | LNCipedia lincRNA (lnc-GPN2-1), lincRNA [lnc-GPN2-1:1]                                                                          | 4.07 | 0.0491 |
| <b>FOXN1</b>          | Homo sapiens forkhead box N1 (FOXN1), mRNA [NM_003593]                                                                          | 4.00 | 0.0478 |
| <b>ARMC7</b>          | armadillo repeat containing 7 [Source:HGNC Symbol;Acc:HGNC:26168] [ENST00000245543]                                             | 3.92 | 0.0491 |
| <b>MICB</b>           | Homo sapiens MHC class I polypeptide-related sequence B (MICB), transcript variant 1, mRNA [NM_005931]                          | 3.91 | 0.0478 |
| <b>lnc-PRL-2</b>      | LNCipedia lincRNA (lnc-PRL-2), lincRNA [lnc-PRL-2:1]                                                                            | 3.86 | 0.0492 |
| <b>CPSF6</b>          | Homo sapiens cleavage and polyadenylation specific factor 6, 68kDa (CPSF6), transcript variant 1, mRNA [NM_007007]              | 3.82 | 0.0491 |
| <b>lnc-VAPA-1</b>     | LNCipedia lincRNA (lnc-VAPA-1), lincRNA [lnc-VAPA-1:1]                                                                          | 3.80 | 0.0491 |
| <b>PSMD3</b>          | Homo sapiens proteasome (prosome, macropain) 26S subunit, non-ATPase, 3 (PSMD3), mRNA [NM_002809]                               | 3.77 | 0.0491 |
| <b>EEF2K</b>          | Homo sapiens eukaryotic elongation factor 2 kinase (EEF2K), mRNA [NM_013302]                                                    | 3.77 | 0.0491 |
| <b>ZNF444</b>         | Homo sapiens zinc finger protein 444 (ZNF444), transcript variant 2, mRNA [NM_001253792]                                        | 3.77 | 0.0491 |
| <b>GYS1</b>           | Homo sapiens glycogen synthase 1 (muscle) (GYS1), transcript variant 1, mRNA [NM_002103]                                        | 3.74 | 0.0491 |
| <b>SCP2</b>           | Homo sapiens sterol carrier protein 2 (SCP2), transcript variant 2, mRNA [NM_001007098]                                         | 3.70 | 0.0491 |
| <b>RETSAT</b>         | retinol saturase (all-trans-retinol 13,14-reductase) [Source:HGNC Symbol;Acc:HGNC:25991] [ENST00000490291]                      | 3.63 | 0.0491 |
| <b>ADAMTS17</b>       | ADAM metalloproteinase with thrombospondin type 1 motif, 17 [Source:HGNC Symbol;Acc:HGNC:17109] [ENST00000378898]               | 3.57 | 0.0491 |
| <b>MRS2</b>           | Homo sapiens MRS2 magnesium transporter (MRS2), transcript variant 1, mRNA [NM_001286264]                                       | 3.57 | 0.0491 |
| <b>FTSJ3</b>          | Homo sapiens FtsJ homolog 3 (E. coli) (FTSJ3), mRNA [NM_017647]                                                                 | 3.49 | 0.0491 |

|                             |                                                                                                                                                        |      |        |
|-----------------------------|--------------------------------------------------------------------------------------------------------------------------------------------------------|------|--------|
| <b>SLC25A10</b>             | Homo sapiens solute carrier family 25 (mitochondrial carrier; dicarboxylate transporter), member 10 (SLC25A10), transcript variant 2, mRNA [NM_012140] | 3.46 | 0.0491 |
| <b>LTB4R2</b>               | Homo sapiens leukotriene B4 receptor 2 (LTB4R2), transcript variant 1, mRNA [NM_019839]                                                                | 3.46 | 0.0491 |
| <b>SNX21</b>                | Homo sapiens sorting nexin family member 21 (SNX21), transcript variant 4, mRNA [NM_001042633]                                                         | 3.44 | 0.0491 |
| <b>IMP3</b>                 | Homo sapiens IMP3, U3 small nucleolar ribonucleoprotein (IMP3), mRNA [NM_018285]                                                                       | 3.43 | 0.0491 |
| <b>PIK3CD</b>               | Homo sapiens phosphatidylinositol-4,5-bisphosphate 3-kinase, catalytic subunit delta (PIK3CD), mRNA [NM_005026]                                        | 3.37 | 0.0491 |
| <b>DNAJA1</b>               | Homo sapiens DnaJ (Hsp40) homolog, subfamily A, member 1 (DNAJA1), mRNA [NM_001539]                                                                    | 3.35 | 0.0491 |
| <b>lnc-RP11-863N1.2.1-3</b> | LNCipedia lincRNA (lnc-RP11-863N1.2.1-3), lincRNA [lnc-RP11-863N1.2.1-3:1]                                                                             | 3.31 | 0.0491 |
| <b>USP32</b>                | ubiquitin specific peptidase 32 [Source:HGNC Symbol;Acc:HGNC:19143] [ENST00000585720]                                                                  | 3.29 | 0.0491 |
| <b>LOC100287728</b>         | Homo sapiens uncharacterized LOC100287728 (LOC100287728), long non-coding RNA [NR_103770]                                                              | 3.23 | 0.0491 |
| <b>ZNF20</b>                | Homo sapiens zinc finger protein 20 (ZNF20), transcript variant 1, mRNA [NM_021143]                                                                    | 3.20 | 0.0491 |
| <b>NOC2L</b>                | Homo sapiens nucleolar complex associated 2 homolog (S. cerevisiae) (NOC2L), mRNA [NM_015658]                                                          | 3.16 | 0.0491 |
| <b>NDUFA3</b>               | Homo sapiens NADH dehydrogenase (ubiquinone) 1 alpha subcomplex, 3, 9kDa (NDUFA3), mRNA [NM_004542]                                                    | 3.12 | 0.0491 |
| <b>C14orf2</b>              | Homo sapiens chromosome 14 open reading frame 2 (C14orf2), transcript variant 2, mRNA [NM_001127393]                                                   | 3.03 | 0.0491 |
| <b>NKAPP1</b>               | Homo sapiens NFkB activating protein pseudogene 1 (NKAPP1), non-coding RNA [NR_027131]                                                                 | 2.98 | 0.0491 |
| <b>SPATA2</b>               | Homo sapiens spermatogenesis associated 2 (SPATA2), transcript variant 1, mRNA [NM_006038]                                                             | 2.96 | 0.0491 |
| <b>XLOC_I2_008783</b>       | BROAD Institute lincRNA (XLOC_I2_008783), lincRNA [TCONS_I2_00016499]                                                                                  | 2.96 | 0.0491 |
| <b>PARP10</b>               | Homo sapiens poly (ADP-ribose) polymerase family, member 10 (PARP10), mRNA [NM_032789]                                                                 | 2.94 | 0.0491 |
| <b>RECQL4</b>               | Homo sapiens RecQ protein-like 4 (RECQL4), mRNA [NM_004260]                                                                                            | 2.93 | 0.0492 |
| <b>POLR2L</b>               | Homo sapiens polymerase (RNA) II (DNA directed) polypeptide L, 7.6kDa (POLR2L), mRNA [NM_021128]                                                       | 2.92 | 0.0491 |
| <b>IGFALS</b>               | Homo sapiens insulin-like growth factor binding protein, acid labile subunit (IGFALS), transcript variant 2, mRNA [NM_004970]                          | 2.91 | 0.0491 |
| <b>HOXB6</b>                | Homo sapiens homeobox B6 (HOXB6), mRNA [NM_018952]                                                                                                     | 2.88 | 0.0491 |
| <b>GPR180</b>               | Homo sapiens G protein-coupled receptor 180 (GPR180), mRNA [NM_180989]                                                                                 | 2.83 | 0.0491 |
| <b>TFAM</b>                 | Homo sapiens transcription factor A, mitochondrial (TFAM), transcript variant 1, mRNA [NM_003201]                                                      | 2.83 | 0.0491 |

|                       |                                                                                                     |      |        |
|-----------------------|-----------------------------------------------------------------------------------------------------|------|--------|
| <b>DNAAF5</b>         | Homo sapiens dynein, axonemal, assembly factor 5 (DNAAF5), transcript variant 1, mRNA [NM_017802]   | 2.78 | 0.0491 |
| <b>ZBED1</b>          | Homo sapiens zinc finger, BED-type containing 1 (ZBED1), transcript variant 3, mRNA [NM_001171135]  | 2.76 | 0.0491 |
| <b>CD2AP</b>          | Homo sapiens CD2-associated protein (CD2AP), mRNA [NM_012120]                                       | 2.75 | 0.0491 |
| <b>EMX2OS</b>         | Homo sapiens EMX2 opposite strand/antisense RNA (EMX2OS), long non-coding RNA [NR_002791]           | 2.75 | 0.0491 |
| <b>EVI2A</b>          | Homo sapiens ecotropic viral integration site 2A (EVI2A), transcript variant 1, mRNA [NM_001003927] | 2.74 | 0.0491 |
| <b>CENPI</b>          | centromere protein I [Source:HGNC Symbol;Acc:HGNC:3968] [ENST00000403304]                           | 2.71 | 0.0491 |
| <b>PRSS33</b>         | Homo sapiens protease, serine, 33 (PRSS33), mRNA [NM_152891]                                        | 2.70 | 0.0491 |
| <b>RXRG</b>           | Homo sapiens retinoid X receptor, gamma (RXRG), transcript variant 2, non-coding RNA [NR_033824]    | 2.69 | 0.0491 |
| <b>lnc-ARHGEF40-1</b> | LNCipedia lincRNA (lnc-ARHGEF40-1), lincRNA [lnc-ARHGEF40-1:1]                                      | 2.67 | 0.0491 |

**TABLE S2**  
**List of Downregulated Genes in the cDNA Microarray Dataset**

| <b>GeneSymbol</b>            | <b>Description</b>                                                                                                                     | <b>Fold-change</b> | <b>p-value</b> |
|------------------------------|----------------------------------------------------------------------------------------------------------------------------------------|--------------------|----------------|
| <b>FOXL2</b>                 | Homo sapiens forkhead box L2 (FOXL2), mRNA [NM_023067]                                                                                 | -161.43            | 0.0456         |
| <b>SPRR2D</b>                | Homo sapiens small proline-rich protein 2D (SPRR2D), mRNA [NM_006945]                                                                  | -122.24            | 0.0491         |
| <b>STAT6</b>                 | Homo sapiens signal transducer and activator of transcription 6, interleukin-4 induced (STAT6), transcript variant 2, mRNA [NM_003153] | -102.51            | 0.0491         |
| <b>BEST1</b>                 | Homo sapiens bestrophin 1 (BEST1), transcript variant 1, mRNA [NM_004183]                                                              | -99.86             | 0.0456         |
| <b>TRPV6</b>                 | Homo sapiens transient receptor potential cation channel, subfamily V, member 6 (TRPV6), mRNA [NM_018646]                              | -95.98             | 0.0456         |
| <b>SPRR2C</b>                | Homo sapiens small proline-rich protein 2C (pseudogene) (SPRR2C), non-coding RNA [NR_003062]                                           | -90.05             | 0.0491         |
| <b>SPRR2E</b>                | Homo sapiens small proline-rich protein 2E (SPRR2E), mRNA [NM_001024209]                                                               | -88.79             | 0.0491         |
| <b>SLIT1</b>                 | Homo sapiens slit homolog 1 (Drosophila) (SLIT1), mRNA [NM_003061]                                                                     | -82.74             | 0.0456         |
| <b>Inc-RP11-597K23.2.1-2</b> | BC011509 Cox15 protein {Mus musculus} (exp=-1; wgp=0; cg=0), partial (5%) [THC2616036]                                                 | -81.40             | 0.0491         |
| <b>TRPV6</b>                 | Homo sapiens transient receptor potential cation channel, subfamily V, member 6 (TRPV6), mRNA [NM_018646]                              | -79.76             | 0.0491         |
| <b>GSE1</b>                  | Homo sapiens Gse1 coiled-coil protein (GSE1), transcript variant 1, mRNA [NM_014615]                                                   | -77.99             | 0.0456         |
| <b>CREB5</b>                 | Homo sapiens cAMP responsive element binding protein 5 (CREB5), transcript variant 1, mRNA [NM_182898]                                 | -64.42             | 0.0491         |
| <b>LOC100507639</b>          | Homo sapiens uncharacterized LOC100507639 (LOC100507639), long non-coding RNA [NR_121625]                                              | -53.47             | 0.0456         |
| <b>KCNG1</b>                 | Homo sapiens potassium channel, voltage gated modifier subfamily G, member 1 (KCNG1), mRNA [NM_002237]                                 | -42.96             | 0.0456         |
| <b>SPATA6L</b>               | Homo sapiens spermatogenesis associated 6-like (SPATA6L), mRNA [NM_001039395]                                                          | -42.25             | 0.0456         |
| <b>VIP</b>                   | Homo sapiens vasoactive intestinal peptide (VIP), transcript variant 1, mRNA [NM_003381]                                               | -38.15             | 0.0491         |
| <b>CCDC144NL-AS1</b>         | PREDICTED: Homo sapiens uncharacterized LOC102724783 (LOC102724783), ncRNA [XR_424802]                                                 | -37.99             | 0.0456         |

|                     |                                                                                                                                |        |        |
|---------------------|--------------------------------------------------------------------------------------------------------------------------------|--------|--------|
| <b>LOC101930053</b> | PREDICTED: Homo sapiens uncharacterized LOC101930053 (LOC101930053), transcript variant X1, ncRNA [XR_428440]                  | -33.87 | 0.0456 |
| <b>IL20RB</b>       | Homo sapiens interleukin 20 receptor beta (IL20RB), mRNA [NM_144717]                                                           | -33.04 | 0.0456 |
| <b>LURAP1L</b>      | Homo sapiens leucine rich adaptor protein 1-like (LURAP1L), mRNA [NM_203403]                                                   | -31.37 | 0.0456 |
| <b>lnc-MAOA-2</b>   | LNCipedia lincRNA (lnc-MAOA-2), lincRNA [lnc-MAOA-2:1]                                                                         | -29.26 | 0.0491 |
| <b>LOC101929174</b> | PREDICTED: Homo sapiens uncharacterized LOC101929174 (LOC101929174), ncRNA [XR_424270]                                         | -25.96 | 0.0491 |
| <b>SYPL2</b>        | Homo sapiens synaptophysin-like 2 (SYPL2), mRNA [NM_001040709]                                                                 | -24.39 | 0.0456 |
| <b>TMIE</b>         | Homo sapiens transmembrane inner ear (TMIE), mRNA [NM_147196]                                                                  | -20.44 | 0.0456 |
| <b>LINC237</b>      | long intergenic non-protein coding RNA 237 [Source:HGNC Symbol;Acc:HGNC:38166] [ENST00000455890]                               | -20.20 | 0.0456 |
| <b>QPCT</b>         | Homo sapiens glutaminyl-peptide cyclotransferase (QPCT), mRNA [NM_012413]                                                      | -20.14 | 0.0491 |
| <b>LOC101930048</b> | PREDICTED: Homo sapiens uncharacterized LOC101930048 (LOC101930048), transcript variant X1, ncRNA [XR_428438]                  | -19.80 | 0.0456 |
| <b>FXD4</b>         | Homo sapiens FXD domain containing ion transport regulator 4 (FXD4), transcript variant 1, mRNA [NM_173160]                    | -19.40 | 0.0491 |
| <b>LAMTOR5-AS1</b>  | Homo sapiens LAMTOR5 antisense RNA 1 (LAMTOR5-AS1), long non-coding RNA [NR_102697]                                            | -19.25 | 0.0456 |
| <b>MOCOS</b>        | Homo sapiens molybdenum cofactor sulfurase (MOCOS), mRNA [NM_017947]                                                           | -19.24 | 0.0456 |
| <b>HCG26</b>        | Homo sapiens HLA complex group 26 (non-protein coding) (HCG26), long non-coding RNA [NR_002812]                                | -19.02 | 0.0456 |
| <b>ABCC8</b>        | Homo sapiens ATP-binding cassette, sub-family C (CFTR/MRP), member 8 (ABCC8), transcript variant 2, mRNA [NM_000352]           | -17.75 | 0.0492 |
| <b>lnc-HSPB7-1</b>  | LNCipedia lincRNA (lnc-HSPB7-1), lincRNA [lnc-HSPB7-1:1]                                                                       | -16.55 | 0.0456 |
| <b>KLHDC7B</b>      | Homo sapiens kelch domain containing 7B (KLHDC7B), mRNA [NM_138433]                                                            | -16.26 | 0.0456 |
| <b>CDH13</b>        | Homo sapiens cadherin 13 (CDH13), transcript variant 1, mRNA [NM_001257]                                                       | -16.19 | 0.0456 |
| <b>MOV10L1</b>      | Homo sapiens Mov10 RISC complex RNA helicase like 1 (MOV10L1), transcript variant 1, mRNA [NM_018995]                          | -15.98 | 0.0456 |
| <b>GDAP1L1</b>      | Homo sapiens ganglioside induced differentiation associated protein 1-like 1 (GDAP1L1), transcript variant 2, mRNA [NM_024034] | -15.47 | 0.0491 |
| <b>SARS</b>         | seryl-tRNA synthetase [Source:HGNC Symbol;Acc:HGNC:10537] [ENST00000369923]                                                    | -15.44 | 0.0491 |
| <b>PRSS3</b>        | Homo sapiens protease, serine, 3 (PRSS3), transcript variant 2, mRNA [NM_002771]                                               | -15.00 | 0.0456 |
| <b>lnc-NDUFS6-8</b> | LNCipedia lincRNA (lnc-NDUFS6-8), lincRNA [lnc-NDUFS6-8:1]                                                                     | -14.95 | 0.0491 |

|                     |                                                                                                                                    |        |        |
|---------------------|------------------------------------------------------------------------------------------------------------------------------------|--------|--------|
| <b>TAC4</b>         | Homo sapiens tachykinin 4 (hemokinin) (TAC4), transcript variant alpha, mRNA [NM_170685]                                           | -14.85 | 0.0491 |
| <b>LOC100289026</b> | PREDICTED: Homo sapiens putative uncharacterized protein FLJ00310-like (LOC100289026), misc_RNA [XR_424060]                        | -14.34 | 0.0456 |
| <b>BEX2</b>         | Homo sapiens brain expressed X-linked 2 (BEX2), transcript variant 1, mRNA [NM_001168399]                                          | -14.17 | 0.0491 |
| <b>KIAA1257</b>     | Homo sapiens KIAA1257 (KIAA1257), mRNA [NM_020741]                                                                                 | -14.04 | 0.0492 |
| <b>ZAP70</b>        | Homo sapiens zeta-chain (TCR) associated protein kinase 70kDa (ZAP70), transcript variant 1, mRNA [NM_001079]                      | -13.50 | 0.0491 |
| <b>CPLX3</b>        | Homo sapiens complexin 3 (CPLX3), mRNA [NM_001030005]                                                                              | -13.19 | 0.0456 |
| <b>ADAMTS14</b>     | Homo sapiens ADAM metallopeptidase with thrombospondin type 1 motif, 14 (ADAMTS14), transcript variant 1, mRNA [NM_139155]         | -13.08 | 0.0456 |
| <b>PATL2</b>        | Homo sapiens protein associated with topoisomerase II homolog 2 (yeast) (PATL2), mRNA [NM_001145112]                               | -12.90 | 0.0491 |
| <b>LOC79999</b>     | Homo sapiens uncharacterized LOC79999 (LOC79999), mRNA [NM_001291904]                                                              | -12.49 | 0.0456 |
| <b>PLEKHG1</b>      | Homo sapiens pleckstrin homology domain containing, family G (with RhoGef domain) member 1 (PLEKHG1), mRNA [NM_001029884]          | -12.48 | 0.0456 |
| <b>LOC101060442</b> | PREDICTED: Homo sapiens calcium-binding mitochondrial carrier protein SCaMC-1-like (LOC101060442), misc_RNA [XR_250827]            | -12.44 | 0.0491 |
| <b>IL2RG</b>        | Homo sapiens interleukin 2 receptor, gamma (IL2RG), mRNA [NM_000206]                                                               | -12.38 | 0.0456 |
| <b>LINC00632</b>    | Homo sapiens long intergenic non-protein coding RNA 632 (LINC00632), transcript variant 3, long non-coding RNA [NR_104228]         | -12.32 | 0.0491 |
| <b>SLPI</b>         | Homo sapiens secretory leukocyte peptidase inhibitor (SLPI), mRNA [NM_003064]                                                      | -12.01 | 0.0491 |
| <b>KCNG1</b>        | PREDICTED: Homo sapiens potassium voltage-gated channel, subfamily G, member 1 (KCNG1), transcript variant X2, mRNA [XM_006723786] | -11.63 | 0.0456 |
| <b>SPINK1</b>       | Homo sapiens serine peptidase inhibitor, Kazal type 1 (SPINK1), mRNA [NM_003122]                                                   | -11.60 | 0.0456 |
| <b>SYNPO</b>        | synaptopodin [Source:HGNC Symbol;Acc:HGNC:30672] [ENST00000394243]                                                                 | -11.56 | 0.0456 |
| <b>HPN</b>          | Homo sapiens hepsin (HPN), transcript variant 1, mRNA [NM_182983]                                                                  | -11.24 | 0.0491 |
| <b>DST</b>          | Homo sapiens dystonin (DST), transcript variant 1e, mRNA [NM_001723]                                                               | -11.11 | 0.0456 |
| <b>CEACAM21</b>     | Homo sapiens carcinoembryonic antigen-related cell adhesion molecule 21 (CEACAM21), transcript variant 3, mRNA [NM_001288773]      | -11.09 | 0.0456 |
| <b>TP53I11</b>      | Homo sapiens tumor protein p53 inducible protein 11 (TP53I11), transcript variant 1, mRNA [NM_001258320]                           | -11.08 | 0.0456 |
| <b>GLDC</b>         | Homo sapiens glycine dehydrogenase (decarboxylating) (GLDC), mRNA [NM_000170]                                                      | -11.06 | 0.0456 |



|                      |                                                                                                                                  |        |        |
|----------------------|----------------------------------------------------------------------------------------------------------------------------------|--------|--------|
| <b>LOC400768</b>     | PREDICTED: Homo sapiens uncharacterized LOC400768 (LOC400768), misc_RNA [XR_110483]                                              | -11.01 | 0.0491 |
| <b>MMP19</b>         | Homo sapiens matrix metalloproteinase 19 (MMP19), transcript variant 1, mRNA [NM_002429]                                         | -10.93 | 0.0456 |
| <b>PLK5</b>          | Homo sapiens polo-like kinase 5 (PLK5), mRNA [NM_001243079]                                                                      | -10.89 | 0.0491 |
| <b>LOC102724467</b>  | Homo sapiens uncharacterized LOC102724467 (LOC102724467), long non-coding RNA [NR_120309]                                        | -10.86 | 0.0491 |
| <b>CHRNA1</b>        | Homo sapiens cholinergic receptor, nicotinic, delta (muscle) (CHRNA1), transcript variant 1, mRNA [NM_000751]                    | -10.66 | 0.0491 |
| <b>DST</b>           | Homo sapiens dystonin (DST), transcript variant 1e, mRNA [NM_001723]                                                             | -10.62 | 0.0456 |
| <b>ATXN7L1</b>       | ataxin 7-like 1 [Source:HGNC Symbol;Acc:HGNC:22210] [ENST00000388807]                                                            | -10.15 | 0.0456 |
| <b>LINC01300</b>     | Homo sapiens long intergenic non-protein coding RNA 1300 (LINC01300), long non-coding RNA [NR_024441]                            | -10.01 | 0.0456 |
| <b>PSMG3-AS1</b>     | Homo sapiens PSMG3 antisense RNA 1 (head to head) (PSMG3-AS1), transcript variant 1, long non-coding RNA [NR_027329]             | -9.97  | 0.0474 |
| <b>DENND2D</b>       | Homo sapiens DENN/MADD domain containing 2D (DENND2D), transcript variant 1, mRNA [NM_024901]                                    | -9.93  | 0.0491 |
| <b>CDX2</b>          | Homo sapiens caudal type homeobox 2 (CDX2), mRNA [NM_001265]                                                                     | -9.65  | 0.0456 |
| <b>LINC00973</b>     | long intergenic non-protein coding RNA 973 [Source:HGNC Symbol;Acc:HGNC:48868] [ENST00000473756]                                 | -9.50  | 0.0491 |
| <b>FRK</b>           | Homo sapiens fyn-related Src family tyrosine kinase (FRK), mRNA [NM_002031]                                                      | -9.39  | 0.0491 |
| <b>LOC100506737</b>  | PREDICTED: Homo sapiens uncharacterized LOC100506737 (LOC100506737), ncRNA [XR_172388]                                           | -9.37  | 0.0491 |
| <b>AP3B2</b>         | Homo sapiens adaptor-related protein complex 3, beta 2 subunit (AP3B2), transcript variant 2, mRNA [NM_004644]                   | -9.33  | 0.0456 |
| <b>HAGLR</b>         | Homo sapiens HOXD antisense growth-associated long non-coding RNA (HAGLR), transcript variant 1, long non-coding RNA [NR_110458] | -9.15  | 0.0456 |
| <b>MAP1LC3B</b>      | Homo sapiens microtubule-associated protein 1 light chain 3 beta (MAP1LC3B), mRNA [NM_022818]                                    | -9.12  | 0.0456 |
| <b>CSF1R</b>         | Homo sapiens colony stimulating factor 1 receptor (CSF1R), transcript variant 1, mRNA [NM_005211]                                | -9.07  | 0.0491 |
| <b>HRG</b>           | Homo sapiens histidine-rich glycoprotein (HRG), mRNA [NM_000412]                                                                 | -8.93  | 0.0491 |
| <b>FAM122C</b>       | Homo sapiens family with sequence similarity 122C (FAM122C), transcript variant 4, mRNA [NM_001170781]                           | -8.87  | 0.0491 |
| <b>PELI2</b>         | Homo sapiens pellino E3 ubiquitin protein ligase family member 2 (PELI2), mRNA [NM_021255]                                       | -8.79  | 0.0459 |
| <b>LTF</b>           | Homo sapiens lactotransferrin (LTF), transcript variant 1, mRNA [NM_002343]                                                      | -8.36  | 0.0456 |
| <b>CCDC144NL-AS1</b> | PREDICTED: Homo sapiens uncharacterized LOC102724783 (LOC102724783), ncRNA [XR_424802]                                           | -8.27  | 0.0491 |
| <b>NHS</b>           | Homo sapiens Nance-Horan syndrome (congenital cataracts and dental anomalies) (NHS), transcript variant 1, mRNA [NM_198270]      | -8.17  | 0.0491 |

|                     |                                                                                                                        |       |        |
|---------------------|------------------------------------------------------------------------------------------------------------------------|-------|--------|
| <b>SLC22A15</b>     | Homo sapiens solute carrier family 22, member 15 (SLC22A15), mRNA [NM_018420]                                          | -8.07 | 0.0456 |
| <b>LOC100499489</b> | Homo sapiens uncharacterized LOC100499489 (LOC100499489), long non-coding RNA [NR_036533]                              | -8.00 | 0.0491 |
| <b>LOC100288798</b> | Homo sapiens uncharacterized LOC100288798 (LOC100288798), transcript variant 1, long non-coding RNA [NR_125377]        | -7.97 | 0.0491 |
| <b>LOC102724539</b> | Homo sapiens uncharacterized LOC102724539 (LOC102724539), long non-coding RNA [NR_125998]                              | -7.67 | 0.0456 |
| <b>HHLA3</b>        | Homo sapiens HERV-H LTR-associating 3 (HHLA3), transcript variant 3, mRNA [NM_001036646]                               | -7.57 | 0.0491 |
| <b>PDCD1</b>        | Homo sapiens programmed cell death 1 (PDCD1), mRNA [NM_005018]                                                         | -7.47 | 0.0491 |
| <b>SLC44A5</b>      | Homo sapiens solute carrier family 44, member 5 (SLC44A5), transcript variant 1, mRNA [NM_152697]                      | -7.46 | 0.0491 |
| <b>CLCC1</b>        | Homo sapiens chloride channel CLIC-like 1 (CLCC1), transcript variant 1, mRNA [NM_001048210]                           | -7.44 | 0.0456 |
| <b>LETM2</b>        | Homo sapiens leucine zipper-EF-hand containing transmembrane protein 2 (LETM2), transcript variant 2, mRNA [NM_144652] | -7.44 | 0.0491 |
| <b>PARP12</b>       | Homo sapiens poly (ADP-ribose) polymerase family, member 12 (PARP12), transcript variant 1, mRNA [NM_022750]           | -7.40 | 0.0456 |
| <b>DNAH1</b>        | Homo sapiens dynein, axonemal, heavy chain 1 (DNAH1), mRNA [NM_015512]                                                 | -7.34 | 0.0456 |
| <b>lnc-HPCAL1-1</b> | LNCipedia lincRNA (lnc-HPCAL1-1), lincRNA [lnc-HPCAL1-1:13]                                                            | -7.27 | 0.0456 |
| <b>SIAE</b>         | Homo sapiens sialic acid acetyltransferase (SIAE), transcript variant 1, mRNA [NM_170601]                              | -7.26 | 0.0491 |
| <b>CLCC1</b>        | Homo sapiens chloride channel CLIC-like 1 (CLCC1), transcript variant 1, mRNA [NM_001048210]                           | -7.26 | 0.0456 |

**Table S3**

**Minimum Energy Required for each LncRNA to Interact with the Predicted mRNAs as Calculated by the rtool Software**

| <b>GNAS-AS1 (FC = 56.87)</b> |                  |
|------------------------------|------------------|
| <b>mRNA</b>                  | <b>MinEnergy</b> |
| SYNPO                        | -41.8            |
| GSE1                         | -30.8            |
| ATXN7L1                      | -30.3            |
| KCNG1                        | -29.6            |
| SMOC2                        | -28.6            |
| SPRR2E                       | -28.5            |
| PRSS3                        | -26.9            |
| HSPA1B                       | -25.9            |
| CCDC106                      | -25.9            |
| ABCC8                        | -25.9            |
| STAT6                        | -25.7            |
| ADAMTS14                     | -25.6            |
| FHDC1                        | -25.5            |
| CREB5                        | -24.3            |
| CHRNE                        | -23.8            |
| KLHDC7B                      | -23.7            |
| SPRR2D                       | -23.6            |
| FBP1                         | -23.3            |

| <b>LINC00668 (FC = 13.28)</b> |                  |
|-------------------------------|------------------|
| <b>mRNA</b>                   | <b>MinEnergy</b> |
| CRYBG3                        | -35.6            |
| FAM212B                       | -34.0            |
| ABCC8                         | -33.5            |
| SYNPO                         | -33.2            |
| RDX                           | -32.3            |
| LIMA1                         | -31.6            |
| SPATA6L                       | -31.1            |
| SARS                          | -31.0            |
| CRYBG3                        | -30.7            |
| DST                           | -30.3            |
| AP3B2                         | -29.5            |
| KMT2B                         | -28.5            |
| TRPV6                         | -28.5            |
| BEX2                          | -28.1            |
| RGS9                          | -27.9            |
| LTF                           | -27.8            |
| DNAH1                         | -27.0            |
| C15ORF37                      | -26.1            |

| <b>MIR205HG (FC = 39.70)</b> |                  |
|------------------------------|------------------|
| <b>mRNA</b>                  | <b>MinEnergy</b> |
| GDAP1L1                      | -37.1            |
| PRG2                         | -36.8            |
| DNAH1                        | -36.4            |
| RGS9                         | -30.3            |
| SARS                         | -30.1            |
| HSPA1B                       | -29.9            |
| DST                          | -29.8            |
| SPRR2D                       | -29.0            |
| SYNPO                        | -28.3            |
| KCNG1                        | -28.0            |
| CPLX3                        | -28.0            |
| RDX                          | -27.8            |
| FAM204A                      | -26.6            |
| ADAMTS14                     | -26.5            |

| <b>LMCD1-AS1 (FC = -5.53)</b> |                  |
|-------------------------------|------------------|
| <b>mRNA</b>                   | <b>MinEnergy</b> |
| BEX2                          | -31.0            |
| MMP19                         | -30.4            |
| TMEM19                        | -29.8            |
| CPLX3                         | -29.6            |
| SYNPO                         | -29.2            |
| FAM212B                       | -29.1            |
| SARS                          | -28.3            |
| KMT2B                         | -28.3            |
| ABCC8                         | -26.5            |
| DST                           | -26.1            |
| RDX                           | -25.6            |
| ZNF44                         | -25.5            |
| FAM122C                       | -25.2            |
| GLDC                          | -24.9            |
| PLEKHG1                       | -24.8            |
| MPP1                          | -24.6            |
| DCAF8                         | -23.8            |
| CREB5                         | -23.7            |
| LTF                           | -23.0            |

| <b>PSMG3-AS1 (FC = -9.9)</b> |                  |
|------------------------------|------------------|
| <b>mRNA</b>                  | <b>MinEnergy</b> |
| KLHDC7B                      | -34.2            |

|        |       |
|--------|-------|
| PRG2   | -32.2 |
| PATL2  | -31.4 |
| TAP2   | -30.4 |
| KCNG1  | -30.3 |
| IL20RB | -30.0 |
| MUC3A  | -29.4 |
| DST    | -28.4 |
| PDCD1  | -27.9 |
| EFNA3  | -27.8 |
| ZAP70  | -27.1 |
| PARP12 | -26.9 |
| FHDC1  | -26.8 |

| <b>LINC01006 (FC = -6.01)</b> |                  |
|-------------------------------|------------------|
| <b>mRNA</b>                   | <b>MinEnergy</b> |
| ABCC8                         | -30.1            |
| CSF1R                         | -28.6            |
| CHRND                         | -28              |
| DST                           | -27.3            |
| ATXN7L1                       | -25.4            |
| PER3                          | -25.0            |
| PTPN22                        | -24.7            |
| DNAH1                         | -24.6            |
| ARRDC4                        | -24.5            |
| CNTNAP3B                      | -23.8            |
| ECEL1                         | -23.5            |
| ADAMTS14                      | -23.3            |
| AP3B2                         | -22.9            |
| SPRR2E                        | -22.7            |
| TAP2                          | -22.6            |
| BEST1                         | -22.4            |
| SLC22A15                      | -22.2            |
| NOS3                          | -22.2            |
| KCNG1                         | -22.0            |
| KLHL29                        | -21.7            |
| FHDC1                         | -21.4            |
| OC90                          | -21.4            |

|       |       |
|-------|-------|
| TUBB3 | -22.9 |
|-------|-------|

| <b>LINC00941 (FC = -6.21)</b> |                  |
|-------------------------------|------------------|
| <b>mRNA</b>                   | <b>MinEnergy</b> |
| BEX2                          | -40.0            |
| SARS                          | -33.8            |
| IL20RB                        | -31.9            |
| AP3B2                         | -30.1            |
| ECEL1                         | -28.4            |
| HRG                           | -28.2            |
| FBP1                          | -27.5            |
| MPP1                          | -27.1            |
| DST                           | -26.2            |
| CPLX3                         | -24.9            |
| ZNF177                        | -24.6            |

| <b>LINC00973 (FC = -9.50)</b> |                  |
|-------------------------------|------------------|
| <b>mRNA</b>                   | <b>MinEnergy</b> |
| RTKN2                         | -31.5            |
| HSPA1B                        | -28.1            |
| DNAH1                         | -27.3            |
| RGS9                          | -26.3            |
| KIAA1257                      | -24.5            |
| GDAP1L1                       | -23.7            |
| VIP                           | -23.6            |
| PDCD1                         | -23.2            |
| OC90                          | -22.6            |
| ZNF33B                        | -22.6            |
| DENND2D                       | -22.0            |
| MOCOS                         | -22.0            |
| BEX2                          | -21.9            |
| ST7L                          | -21.9            |
| DST                           | -21.6            |
| FAM122C                       | -21.2            |
| CHRND                         | -21.2            |
| ADAMTS14                      | -20.9            |
| PTPN22                        | -20.7            |
| MIOX                          | -20.7            |
| STXBP3                        | -20.6            |
| CLCC1                         | -20.5            |
| LIMA1                         | -20.3            |
